# Supplementary material for: Self-reported COVID-19 vaccine hesitancy and uptake among participants from different racial and ethnic groups in the United States and United Kingdom
Source: PubMed Central journal article supplement (PMC8807721; doi:10.1038/s41467-022-28200-3), 2022-02-01
Supplement: 41467_2022_28200_MOESM1_ESM.pdf [file 41467_2022_28200_MOESM1_ESM.pdf]

# Self-reported COVID-19 vaccine hesitancy and uptake among participants from different racial and ethnic groups in the United States and United Kingdom

Long H. Nguyen\*, Amit D. Joshi\*, David A. Drew\*, Jordi Merino, Wenjie Ma, Chun-Han Lo, Sohee Kwon, Kai Wang, Mark S. Graham, Lorenzo Polidori, Cristina Menni, Carole H. Sudre, Adjoa Anyane-Yeboah, Christina M. Astley, Erica T. Warner, Christina Y. Hu, Somesh Selvachandran, Richard Davies, Denis Nash, Paul W. Franks, Jonathan Wolf, Sebastien Ourselin, Claire J. Steves, Tim D. Spector, and Andrew T. Chan, COPE Consortium  
\*equal contribution

A list of all contributing consortium authors can be found at the end of the document

## Supplementary Information

|                                                                                                                                                       |           |
|-------------------------------------------------------------------------------------------------------------------------------------------------------|-----------|
| <b><i>Supplementary Methods</i></b>                                                                                                                   | <b>2</b>  |
| Community-level sociodemographic factors                                                                                                              | 2         |
| Supplementary statistical analysis, handling of missing data, and power                                                                               | 3         |
| <b><i>Supplementary Figures &amp; Tables</i></b>                                                                                                      | <b>4</b>  |
| Supplementary Figure 1. Study diagram                                                                                                                 | 4         |
| Supplementary Table 1. Baseline characteristics of study participants by race and ethnicity according to country of enrollment                        | 5         |
| Supplementary Table 2. Baseline characteristics of study participants by vaccine willingness and country of enrollment                                | 9         |
| Supplementary Table 3. Inverse probability weighted analyses of vaccine hesitancy and uptake by race and ethnicity according to country of enrollment | 12        |
| Supplementary Table 4. Vaccine hesitancy by geographical region according to country of enrollment                                                    | 14        |
| Supplementary Table 5. Reasons for vaccine hesitancy by race and ethnicity according to country of enrollment                                         | 15        |
| Supplementary Table 6. Baseline characteristics of study participants by vaccination status and country of enrollment                                 | 17        |
| Supplementary Table 7. Vaccine uptake by geographical region according to country of enrollment                                                       | 20        |
| Supplementary Table 8. Localized symptoms among vaccinated participants according to country of enrollment                                            | 21        |
| Supplementary Table 9. Vaccine-related questions through February 1, 2021                                                                             | 22        |
| Supplementary Table 10. Race and ethnicity categories by country of enrollment                                                                        | 24        |
| Supplementary Table 11. Partnering cohorts within the COPE Consortium                                                                                 | 25        |
| <b><i>Supplementary References</i></b>                                                                                                                | <b>26</b> |

## **Supplementary Methods**

### **Prior validation work**

To ascertain the validity of self-reported COVID Symptom Study information, we performed a validation study among a random subset of 235 users who reported a COVID-19 test from whom we requested photographs of their COVID-19 test reports. Study staff blinded to participant-provided information found excellent agreement between self-report and test reports with 88% sensitivity and 94% specificity.

### **Ascertainment of racial and ethnic identity**

Individuals who identified their race or ethnicity as “Other” were offered an opportunity to provide a free-text entry. Those who identified as “Mixed Race” or selected more than one race were categorized as “More than one race”. “Native Hawaiian and Pacific Islanders” were classified as Asian. Due to limited sample sizes, “American Indian or Alaskan Natives” were categorized as “Other”, and “Other” and “More than one race” were combined. In the U.K., individuals were asked whether they identified as “Chinese” or “Asian/British Asian”, which offered the following examples, but did not specifically ask about other racial identities from the Asian continent: “Indian, Pakistani, Bangladeshi, Other”.

### **Community-level sociodemographic factors**

Participants who elected to share information on their zip code (U.S./U.K.) or Lower Layer Super Output Area (LSOA, U.K.) of residence were assigned community-level socioeconomic measures. Socioeconomic measures were generated using established metrics derived from aggregated census data: proportion of individuals aged  $\geq 25$  years old with a Bachelor’s degree and median annual income (U.S.)<sup>1</sup> and the education and income measures from the U.K.’s Indices of Multiple Deprivation (deciles, IMD),<sup>2</sup> respectively. U.S. zip codes were further categorized into broader regions using U.S. Census Bureau criteria<sup>3</sup> (American Northeast,

Midwest, South, and West) and LSOAs were linked to one of four countries in the U.K. (England, Scotland, Northern Ireland, and Wales).<sup>4</sup>

### **Supplementary statistical analysis, handling of missing data, and power**

For missing data, imputation replaced no more than 5% of missing values for a given metadatum with numeric values replaced with the median and categorical variables imputed using the mode. LHN, ADJ, DAD, and ATC had access to raw data. LHN performed data analysis, and the corresponding author had full access to data and the final responsibility to submit for publication. Based on the size of the assembled study population and the empirically observed vaccine hesitancy of 6%, we had 80% power to detect a minimum OR of 1.12 and 1.07, respectively, in the U.S. and the U.K. for risk of (or protection from) reporting vaccine hesitancy among non-white compared to white participants.

## Supplementary Figures & Tables

### Supplementary Figure 1. Study diagram

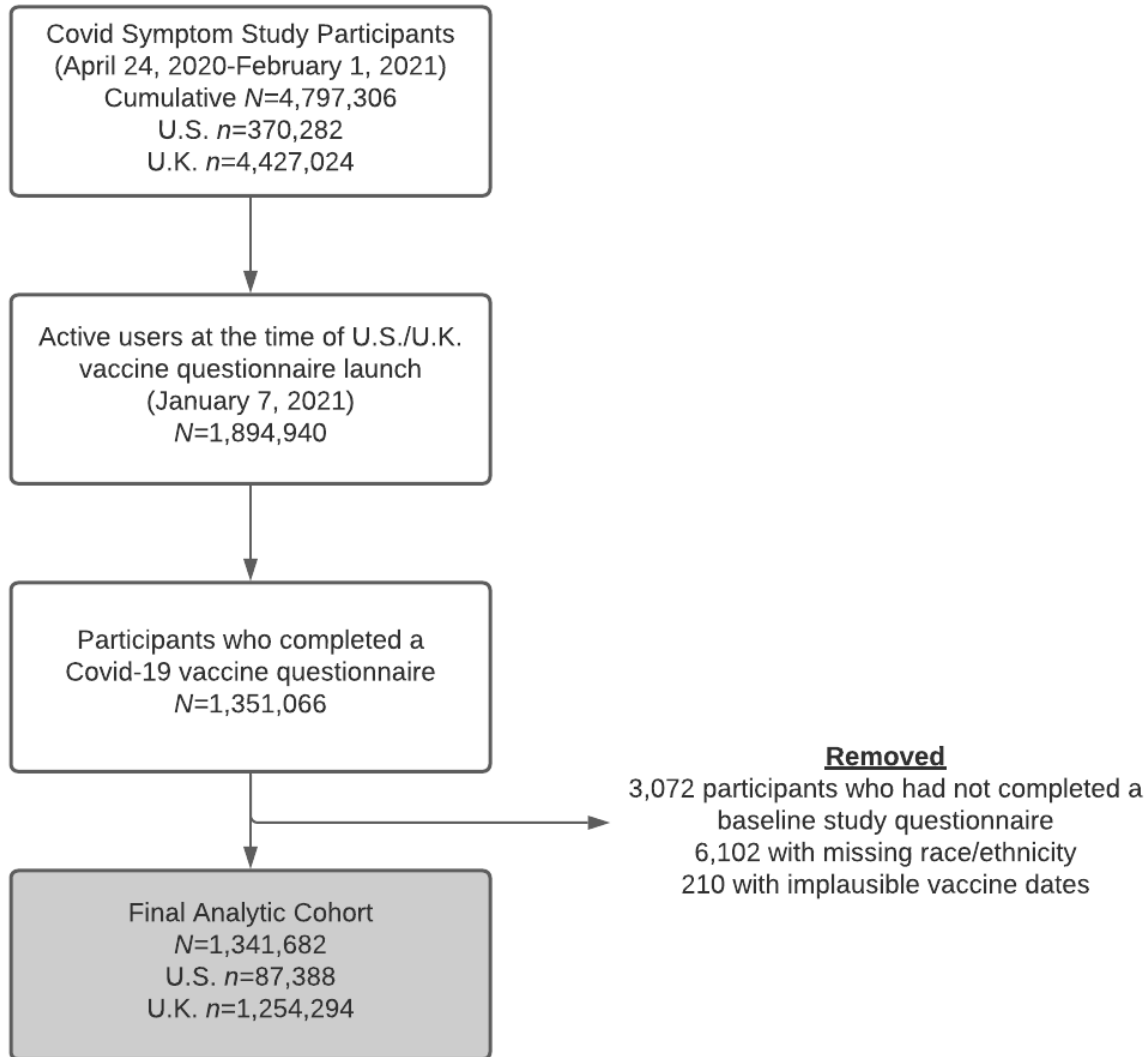

**Supplementary Table 1. Baseline characteristics of study participants by race and ethnicity according to country of enrollment**

|                               | United States      |                   |                      |                   |                                    |
|-------------------------------|--------------------|-------------------|----------------------|-------------------|------------------------------------|
|                               | White<br>(n=76286) | Black<br>(n=2468) | Hispanic<br>(n=3838) | Asian<br>(n=3602) | Other/More than<br>one<br>(n=1194) |
| <b>Age (years)</b>            | 60.9 (15.0)        | 58.5 (16.0)       | 50.5 (18.1)          | 55.8 (20.3)       | 56.9 (17.1)                        |
| <25                           | 1804 (2.4)         | 110 (4.5)         | 341 (8.9)            | 370 (10.3)        | 58 (4.9)                           |
| 25-34                         | 4035 (5.3)         | 149 (6.0)         | 563 (14.7)           | 376 (10.4)        | 106 (8.9)                          |
| 35-44                         | 6603 (8.7)         | 210 (8.5)         | 597 (15.6)           | 409 (11.4)        | 136 (11.4)                         |
| 45-54                         | 8716 (11.4)        | 341 (13.8)        | 646 (16.8)           | 445 (12.4)        | 163 (13.7)                         |
| 55-64                         | 15970 (20.9)       | 635 (25.7)        | 664 (17.3)           | 434 (12.0)        | 237 (19.8)                         |
| ≥65                           | 39158 (51.3)       | 1023 (41.5)       | 1027 (26.8)          | 1568 (43.5)       | 494 (41.4)                         |
| <b>Female sex</b>             | 50523 (66.2)       | 1825 (73.9)       | 2421 (63.1)          | 2193 (60.9)       | 773 (64.7)                         |
| <b>BMI (kg/m<sup>2</sup>)</b> | 27.0 (6.0)         | 30.0 (7.0)        | 27.9 (6.4)           | 25.1 (5.1)        | 28. (6.7)                          |
| <18.5                         | 1480 (1.9)         | 32 (1.3)          | 91 (2.4)             | 139 (3.9)         | 18 (1.5)                           |
| 18.5-24.9                     | 31208 (40.9)       | 582 (23.6)        | 1337 (34.8)          | 1900 (52.7)       | 404 (33.8)                         |
| 25-29.9                       | 25206 (33.0)       | 815 (33.0)        | 1261 (32.9)          | 1085 (30.1)       | 419 (35.1)                         |
| ≥30                           | 18392 (24.1)       | 1039 (42.1)       | 1149 (29.9)          | 478 (13.3)        | 353 (29.6)                         |
| <b>Comorbidities</b>          |                    |                   |                      |                   |                                    |
| Diabetes                      | 3770 (4.9)         | 274 (11.1)        | 215 (5.6)            | 272 (7.6)         | 74 (6.2)                           |
| Heart Disease                 | 5988 (7.8)         | 165 (6.7)         | 219 (5.7)            | 263 (7.3)         | 102 (8.5)                          |
| Lung Disease                  | 2261 (3.0)         | 76 (3.1)          | 59 (1.5)             | 68 (1.9)          | 46 (3.9)                           |

|                              |               |               |               |               |               |
|------------------------------|---------------|---------------|---------------|---------------|---------------|
| Kidney Disease               | 1392 (1.8)    | 63 (2.6)      | 65 (1.7)      | 79 (2.2)      | 37 (3.1)      |
| Cancer                       | 2202 (2.9)    | 55 (2.2)      | 80 (2.1)      | 79 (2.2)      | 27 (2.3)      |
| <b>Education</b>             | 45.5 (18.4)   | 36.5 (17.5)   | 38.9 (18.9)   | 47.0 (17.7)   | 43.1 (19.1)   |
| <b>Income</b>                | 81106 (31527) | 68086 (28329) | 74883 (30427) | 89684 (31559) | 78042 (30526) |
| <b>Current/prior smoking</b> | 22254 (29.2)  | 723 (29.3)    | 992 (25.8)    | 838 (23.3)    | 392 (32.8)    |
| <b>Healthcare worker</b>     | 5985 (7.8)    | 226 (9.2)     | 346 (9.0)     | 273 (7.6)     | 105 (8.8)     |
| <b>Prior COVID-19</b>        | 4542 (6.0)    | 204 (8.3)     | 514 (13.4)    | 192 (5.3)     | 89 (7.5)      |

---

All racial categories were defined as each respective race not of Hispanic or Latino ancestry. Census-level data on education assessed the proportion of the general population above age 25 years with a bachelor's degree and income using median annual household income (U.S. dollars/year; **Supplementary Methods**). N (percentages) presented for categorical variables. Values are means (SD) for continuous variables. Values of polytomous variables may not sum to 100% due to rounding  
Abbreviations: BMI (body mass index), m (meter), kg (kilogram).

|                               | United Kingdom       |                   |                          |                                       |                                     |
|-------------------------------|----------------------|-------------------|--------------------------|---------------------------------------|-------------------------------------|
|                               | White<br>(n=1204721) | Black<br>(n=9615) | South Asian<br>(n=17628) | Middle East/East<br>Asian<br>(n=7689) | More than<br>one/other<br>(n=14641) |
| <b>Age (years)</b>            | 55.0 (15.4)          | 47.4 (15.6)       | 49.6 (15.1)              | 49.3 (15.4)                           | 46.7 (15.7)                         |
| <25                           | 46399 (3.9)          | 920 (9.6)         | 816 (4.6)                | 369 (4.8)                             | 1462 (10.0)                         |
| 25-34                         | 92413 (7.7)          | 1312 (13.6)       | 2021 (11.5)              | 1055 (13.7)                           | 2022 (13.8)                         |
| 35-44                         | 159125 (13.2)        | 1676 (17.4)       | 4063 (23.0)              | 1710 (22.2)                           | 3122 (21.3)                         |
| 45-54                         | 238482 (19.8)        | 2186 (22.7)       | 4391 (24.9)              | 1668 (21.7)                           | 3172 (21.7)                         |
| 55-64                         | 306131 (25.4)        | 2323 (24.2)       | 3145 (17.8)              | 1404 (18.3)                           | 2811 (19.2)                         |
| ≥65                           | 362171 (30.1)        | 1198 (12.5)       | 3192 (18.1)              | 1483 (19.3)                           | 2052 (14.0)                         |
| <b>Female sex</b>             | 711693 (59.1)        | 5642 (58.7)       | 9883 (56.1)              | 4438 (57.7)                           | 9016 (61.6)                         |
| <b>BMI (kg/m<sup>2</sup>)</b> | 26.6 (6.0)           | 27.7 (7.2)        | 25.5 (5.7)               | 25.3 (6.0)                            | 26.2 (6.7)                          |
| <18.5                         | 31567 (2.6)          | 376 (3.9)         | 796 (4.5)                | 334 (4.3)                             | 590 (4.0)                           |
| 18.5-24.9                     | 517674 (43.0)        | 3477 (36.2)       | 8779 (49.8)              | 4119 (53.6)                           | 7033 (48.0)                         |
| 25-29.9                       | 404507 (33.6)        | 3087 (32.1)       | 5422 (30.8)              | 2131 (27.7)                           | 4265 (29.1)                         |
| ≥30                           | 250973 (20.8)        | 2675 (27.8)       | 2631 (14.9)              | 1105 (14.4)                           | 2753 (18.8)                         |
| <b>Comorbidities</b>          |                      |                   |                          |                                       |                                     |
| Diabetes                      | 39168 (3.3)          | 429 (4.5)         | 1233 (7.0)               | 275 (3.6)                             | 461 (3.1)                           |
| Heart Disease                 | 48828 (4.1)          | 258 (2.7)         | 832 (4.7)                | 300 (3.9)                             | 440 (3.0)                           |
| Lung Disease                  | 25971 (2.2)          | 155 (1.6)         | 294 (1.7)                | 118 (1.5)                             | 226 (1.5)                           |
| Kidney Disease                | 11089 (0.9)          | 112 (1.2)         | 206 (1.2)                | 69 (0.9)                              | 128 (0.9)                           |
| Cancer                        | 17046 (2.1)          | 121 (1.8)         | 151 (1.3)                | 71 (1.4)                              | 129 (1.4)                           |

|                              |               |             |             |             |             |
|------------------------------|---------------|-------------|-------------|-------------|-------------|
| <b>Education</b>             | 7.1 (2.5)     | 6.5 (2.6)   | 7.24 (2.50) | 7.5 (2.4)   | 7.4 (2.5)   |
| <b>Income</b>                | 7.0 (2.5)     | 5.7 (2.7)   | 6.41 (2.65) | 6.6 (2.6)   | 6.5 (2.6)   |
| <b>Current/prior smoking</b> | 272021 (22.6) | 2210 (23.0) | 2711 (15.4) | 1533 (19.9) | 3110 (21.2) |
| <b>Healthcare worker</b>     | 47300 (3.9)   | 636 (6.6)   | 1365 (7.7)  | 404 (5.3)   | 611 (4.2)   |
| <b>Prior COVID-19</b>        | 72555 (6.0)   | 1020 (10.6) | 1762 (10.0) | 625 (8.1)   | 1242 (8.5)  |

Census-level data on education used the education score and income score for the Index of Multiple Deprivation, respectively (**Supplementary Methods**). N (percentages) presented for categorical variables. Values are means (SD) for continuous variables. Values of polytomous variables may not sum to 100% due to rounding  
Abbreviations: BMI (body mass index), m (meter), kg (kilogram)



**Supplementary Table 2. Baseline characteristics of study participants by vaccine willingness and country of enrollment**

|                               | United States        |                    |                       |
|-------------------------------|----------------------|--------------------|-----------------------|
|                               | Willing<br>(n=67344) | Unsure<br>(n=4943) | Unwilling<br>(n=1363) |
| <b>Age (years)</b>            | 60.8 (15.5)          | 54.7 (17.2)        | 54.1 (16.8)           |
| <25                           | 2090 (3.1)           | 317 (6.4)          | 82 (6.0)              |
| 25-34                         | 3681 (5.5)           | 486 (9.8)          | 145 (10.6)            |
| 35-44                         | 5615 (8.3)           | 582 (11.8)         | 165 (12.1)            |
| 45-54                         | 7548 (11.2)          | 783 (15.8)         | 217 (15.9)            |
| 55-64                         | 13584 (20.2)         | 1063 (21.5)        | 320 (23.5)            |
| ≥65                           | 34826 (51.7)         | 1712 (34.6)        | 434 (31.8)            |
| <b>Female sex</b>             | 43181 (64.1)         | 3597 (72.8)        | 971 (71.2)            |
| <b>Race/ethnicity</b>         |                      |                    |                       |
| White                         | 59429 (88.2)         | 3708 (75.0)        | 1007 (73.9)           |
| Black                         | 1568 (2.3)           | 468 (9.5)          | 143 (10.5)            |
| Hispanic                      | 2730 (4.1)           | 385 (7.8)          | 120 (8.8)             |
| Asian                         | 2780 (4.1)           | 262 (5.3)          | 47 (3.4)              |
| More than one / other         | 837 (1.2)            | 120 (2.4)          | 46 (3.4)              |
| <b>BMI (kg/m<sup>2</sup>)</b> | 27.0 (6.0)           | 28.0 (6.8)         | 27.9 (6.8)            |
| <18.5                         | 1372 (2.0)           | 121 (2.4)          | 36 (2.6)              |
| 18.5-24.9                     | 27477 (40.8)         | 1792 (36.3)        | 502 (36.8)            |
| 25-29.9                       | 22390 (33.2)         | 1493 (30.2)        | 405 (29.7)            |
| ≥30                           | 16105 (23.9)         | 1537 (31.1)        | 420 (30.8)            |
| <b>Comorbidities</b>          |                      |                    |                       |
| Diabetes                      | 3626 (5.4)           | 240 (4.9)          | 76 (5.6)              |
| Heart Disease                 | 5296 (7.9)           | 318 (6.4)          | 92 (6.7)              |
| Lung Disease                  | 1907 (2.8)           | 168 (3.4)          | 43 (3.2)              |
| Kidney Disease                | 1290 (1.9)           | 97 (2.0)           | 34 (2.5)              |
| Cancer                        | 1955 (2.9)           | 113 (2.3)          | 19 (1.4)              |
| <b>Education</b>              | 45.9 (18.4)          | 37.5 (17.5)        | 34.4 (16.3)           |

|                              |               |               |               |
|------------------------------|---------------|---------------|---------------|
| <b>Income</b>                | 81764 (31778) | 73783 (28354) | 70161 (25705) |
| <b>Current/prior smoking</b> | 19582 (29.1)  | 1542 (31.2)   | 411 (30.2)    |
| <b>Healthcare worker</b>     | 1833 (2.7)    | 301 (6.1)     | 153 (11.2)    |
| <b>Prior COVID-19</b>        | 3734 (5.5)    | 702 (14.2)    | 263 (19.3)    |

All racial categories were defined as each respective race not of Hispanic or Latino ancestry. Census-level data on education assessed the proportion of the general population above age 25 years with a Bachelor's degree and income using median annual household income (U.S. dollars/year; **Supplementary Methods**). N (percentages) presented for categorical variables. Values are means (SD) for continuous variables. Values of polytomous variables may not sum to 100% due to rounding  
Abbreviations: BMI (body mass index), m (meter), kg (kilogram)

### United Kingdom

|                               | <b>Willing</b><br>(n=1093110) | <b>Unsure</b><br>(n=52021) | <b>Unwilling</b><br>(n=9857) |
|-------------------------------|-------------------------------|----------------------------|------------------------------|
| <b>Age (years)</b>            | 54.9 (15.0)                   | 46.1 (14.7)                | 45.0 (15.3)                  |
| <25                           | 42646 (3.9)                   | 4609 (8.9)                 | 855 (8.7)                    |
| 25-34                         | 81363 (7.4)                   | 7383 (14.2)                | 1907 (19.3)                  |
| 35-44                         | 142917 (13.1)                 | 11521 (22.1)               | 2320 (23.5)                  |
| 45-54                         | 218009 (19.9)                 | 12823 (24.6)               | 1979 (20.1)                  |
| 55-64                         | 285250 (26.1)                 | 10027 (19.3)               | 1702 (17.3)                  |
| ≥65                           | 322925 (29.5)                 | 5658 (10.9)                | 1094 (11.1)                  |
| <b>Female sex</b>             | 631477 (57.8)                 | 35134 (67.5)               | 6467 (65.6)                  |
| <b>Race/ethnicity</b>         |                               |                            |                              |
| White                         | 1053810 (96.4)                | 47663 (91.6)               | 9071 (92.0)                  |
| Black                         | 7171 (0.7)                    | 1340 (2.6)                 | 276 (2.8)                    |
| South Asian                   | 13712 (1.3)                   | 1258 (2.4)                 | 229 (2.3)                    |
| Middle East/East Asian        | 6175 (0.6)                    | 677 (1.3)                  | 94 (1.0)                     |
| More than one/other           | 12242 (1.1)                   | 1083 (2.1)                 | 187 (1.9)                    |
| <b>BMI (kg/m<sup>2</sup>)</b> | 26.6 (6.0)                    | 26.4 (6.4)                 | 26.1 (6.4)                   |
| <18.5                         | 28162 (2.6)                   | 2122 (4.1)                 | 478 (4.8)                    |
| 18.5-24.9                     | 470397 (43.0)                 | 23423 (45.0)               | 4452 (45.2)                  |
| 25-29.9                       | 368595 (33.7)                 | 15604 (30.0)               | 2972 (30.2)                  |
| ≥30                           | 225956 (20.7)                 | 10872 (20.9)               | 1955 (19.8)                  |
| <b>Comorbidities</b>          |                               |                            |                              |

|                                                       |               |              |             |
|-------------------------------------------------------|---------------|--------------|-------------|
| Diabetes                                              | 36909 (3.4)   | 1004 (1.9)   | 198 (2.0)   |
| Heart Disease                                         | 42258 (3.9)   | 979 (1.9)    | 191 (1.9)   |
| Lung Disease                                          | 22022 (2.0)   | 672 (1.3)    | 127 (1.3)   |
| Kidney Disease                                        | 9459 (0.9)    | 315 (0.6)    | 61 (0.6)    |
| Cancer                                                | 14540 (1.9)   | 311 (0.9)    | 88 (1.3)    |
| <b>Index of multiple deprivation, education score</b> | 7.1 (2.5)     | 6.5 (2.7)    | 6.4 (2.7)   |
| <b>Index of multiple deprivation, income score</b>    | 7.0 (2.5)     | 6.4 (2.7)    | 6.3 (2.7)   |
| <b>Current/prior smoking</b>                          | 242643 (22.2) | 12671 (24.4) | 2404 (24.4) |
| <b>Healthcare worker</b>                              | 24300 (2.2)   | 1972 (3.8)   | 653 (6.6)   |
| <b>Prior COVID-19</b>                                 | 62681 (5.7)   | 4583 (8.8)   | 1034 (10.5) |

All racial categories were defined as each respective race not of Hispanic or Latino ancestry. Census-level data on education used the education score and income score for the Index of Multiple Deprivation, respectively (**Supplementary Methods**). N (percentages) presented for categorical variables. Values are means (SD) for continuous variables. Values of polytomous variables may not sum to 100% due to rounding. Abbreviations: BMI (body mass index), m (meter), kg (kilogram)

**Supplementary Table 3. Inverse probability weighted analyses of vaccine hesitancy and uptake by race and ethnicity according to country of enrollment**

|                                                       | United States  |                     |                     |                        |                     |
|-------------------------------------------------------|----------------|---------------------|---------------------|------------------------|---------------------|
|                                                       | White          | Black               | Hispanic            | Asian                  | More than one/other |
| <b>Vaccine hesitancy</b>                              |                |                     |                     |                        |                     |
| <b>Number hesitant or unsure / total</b>              | 4715/64144     | 611/2179            | 505/3235            | 309/3089               | 166/1003            |
| <b>Multivariable-adjusted OR (95% CI)<sup>1</sup></b> | 1.0 (ref.)     | 2.90 (2.58 to 3.38) | 1.48 (1.30 to 1.69) | 1.06 (0.89 to 1.26)    | 1.98 (1.54 to 2.54) |
| <b>Vaccine uptake (all)</b>                           |                |                     |                     |                        |                     |
| <b>Number receiving a vaccine / total</b>             | 15341/64144    | 362/2179            | 519/3235            | 716/3089               | 202/1003            |
| <b>Multivariable-adjusted OR (95% CI)<sup>1</sup></b> | 1.0 (ref.)     | 0.70 (0.60 to 0.81) | 0.96 (0.86 to 1.07) | 1.03 (0.92 to 1.14)    | 1.04 (0.84 to 1.28) |
| <b>Vaccine uptake (vaccine willing)</b>               |                |                     |                     |                        |                     |
| <b>Number receiving a vaccine / total</b>             | 15062/59429    | 328/1568            | 499/2730            | 681/2780               | 192/837             |
| <b>Multivariable-adjusted OR (95% CI)<sup>1</sup></b> | 1.0 (ref.)     | 0.83 (0.71 to 0.97) | 0.98 (0.88 to 1.09) | 1.00 (0.90 to 1.12)    | 1.10 (0.88 to 1.38) |
|                                                       | United Kingdom |                     |                     |                        |                     |
|                                                       | White          | Black               | South Asian         | Middle East/East Asian | More than one/other |
| <b>Vaccine hesitancy</b>                              |                |                     |                     |                        |                     |
| <b>Number hesitant or unsure / total</b>              | 567734/1110544 | 1616/8787           | 1487/15199          | 771/6946               | 1270/13512          |
| <b>Multivariable-adjusted OR (95% CI)<sup>1</sup></b> | 1.0 (ref.)     | 2.52 (2.35 to 2.70) | 1.52 (1.39 to 1.66) | 1.58 (1.40 to 1.79)    | 1.40 (1.30 to 1.52) |
| <b>Vaccine uptake (all)</b>                           |                |                     |                     |                        |                     |
| <b>Number receiving a vaccine / total</b>             | 171453/1110544 | 1022/8787           | 2339/15199          | 922/6946               | 1506/13512          |
| <b>Multivariable-adjusted OR (95% CI)<sup>1</sup></b> | 1.0 (ref.)     | 0.93 (0.86 to 1.01) | 1.22 (1.16 to 1.28) | 1.06 (0.98 to 1.16)    | 1.03 (0.97 to 1.09) |
| <b>Vaccine uptake (vaccine willing)</b>               |                |                     |                     |                        |                     |

|                                                       |                |                     |                     |                     |                     |
|-------------------------------------------------------|----------------|---------------------|---------------------|---------------------|---------------------|
| <b>Number receiving a vaccine / total</b>             | 168369/1053810 | 951/7171            | 2255/13712          | 884/6175            | 1469/12242          |
| <b>Multivariable-adjusted OR (95% CI)<sup>1</sup></b> | 1.0 (ref.)     | 1.01 (0.93 to 1.10) | 1.24 (1.18 to 1.31) | 1.08 (0.99 to 1.18) | 1.06 (1.00 to 1.13) |

<sup>1</sup>Conditioned upon age and date of study entry, adjustment for personal history of diabetes, heart disease, lung disease, kidney disease, current smoking status, body mass index, prior reported history of COVID-19 infection, frontline healthcare worker status, region, and education and income at the community level with inverse probability weighting  
Abbreviations: CI (confidence interval), OR (odds ratio)

## Supplementary Table 4. Vaccine hesitancy by geographical region according to country of enrollment

|                                                         | United States |                     |                     |                     |
|---------------------------------------------------------|---------------|---------------------|---------------------|---------------------|
|                                                         | Northeast     | Midwest             | South               | West                |
| <b>Number of individuals hesitant or unsure / total</b> | 1174/16365    | 1133/13093          | 1931/17633          | 1969/24474          |
| <b>Age-adjusted OR (95% CI)<sup>1</sup></b>             | 1.0 (ref.)    | 1.16 (1.06 to 1.26) | 1.43 (1.33 to 1.54) | 1.16 (1.08 to 1.25) |
| <b>Multivariable-adjusted OR (95% CI)<sup>2</sup></b>   | 1.0 (ref.)    | 1.12 (1.03 to 1.23) | 1.31 (1.21 to 1.41) | 1.13 (1.05 to 1.23) |
| <b>Multivariable-adjusted OR (95% CI)<sup>3</sup></b>   | 1.0 (ref.)    | 1.03 (0.94 to 1.12) | 1.24 (1.14 to 1.34) | 1.04 (0.96 to 1.12) |

<sup>1</sup>Conditioned upon age and date of study entry

<sup>2</sup>Additional conditioning upon sex and adjustment for race/ethnicity, personal history of diabetes, heart disease, lung disease, kidney disease, current smoking status, body mass index, and prior reported history of COVID-19 infection

<sup>3</sup>Additional adjustment for frontline healthcare worker status and education and income at the community level

Regions defined by the U.S. Census Bureau guidelines. The Northeast included the states of Connecticut, Maine, Massachusetts, New Hampshire, New Jersey, New York, Pennsylvania, Rhode Island, and Vermont. The Midwest included the states of Illinois, Indiana, Iowa, Kansas, Michigan, Minnesota, Missouri, Nebraska, North Dakota, Ohio, South Dakota, and Wisconsin. The South included Alabama, Arkansas, Delaware, Florida, Georgia, Kentucky, Louisiana, Maryland, Mississippi, North Carolina, Oklahoma, South Carolina, Tennessee, Texas, Virginia, and West Virginia. The West included Alaska, Arizona, California, Colorado, Hawaii, Idaho, Montana, New Mexico, Nevada, Oregon, Utah, Washington, and Wyoming.

Abbreviations: CI (confidence interval), OR (odds ratio)

|                                                         | United Kingdom |                     |                     |                     |
|---------------------------------------------------------|----------------|---------------------|---------------------|---------------------|
|                                                         | England        | Northern Ireland    | Scotland            | Wales               |
| <b>Number of individuals hesitant or unsure / total</b> | 50580/952267   | 434/5994            | 2744/56232          | 2581/49811          |
| <b>Age-adjusted OR (95% CI)<sup>1</sup></b>             | 1.0 (ref.)     | 1.38 (1.25 to 1.51) | 0.96 (0.93 to 1.00) | 1.10 (1.06 to 1.15) |
| <b>Multivariable-adjusted OR (95% CI)<sup>2</sup></b>   | 1.0 (ref.)     | 1.44 (1.31 to 1.58) | 1.00 (0.96 to 1.04) | 1.13 (1.08 to 1.18) |
| <b>Multivariable-adjusted OR (95% CI)<sup>3</sup></b>   | 1.0 (ref.)     | 1.42 (1.30 to 1.57) | 1.00 (0.96 to 1.04) | 1.11 (1.07 to 1.16) |

<sup>1</sup>Conditioned upon age and date of study entry

<sup>2</sup>Additional conditioning upon sex and adjustment for race/ethnicity, personal history of diabetes, heart disease, lung disease, kidney disease, current smoking status, body mass index, and prior reported history of COVID-19 infection

<sup>3</sup>Additional adjustment for frontline healthcare worker status and education and income at the community level

Abbreviations: CI (confidence interval), OR (odds ratio)

**Supplementary Table 5. Reasons for vaccine hesitancy by race and ethnicity according to country of enrollment**

| Reason Cited (%)                           | United States     |                  |                     |                  |                                   |
|--------------------------------------------|-------------------|------------------|---------------------|------------------|-----------------------------------|
|                                            | White<br>(n=4715) | Black<br>(n=611) | Hispanic<br>(n=505) | Asian<br>(n=309) | More than<br>one/other<br>(n=166) |
| Concerned about the long-term side effects | 51.8              | 57.3             | 54.9                | 49.5             | 47.0                              |
| Concerned about adverse reaction           | 44.7              | 54.2             | 51.9                | 47.2             | 45.8                              |
| Do not know enough about it                | 41.7              | 50.6             | 50.9                | 42.4             | 41.6                              |
| Personal belief/philosophical reasons      | 8.8               | 14.1             | 13.1                | 7.8              | 10.8                              |
| Illness/Medication                         | 8.3               | 8.7              | 7.5                 | 7.1              | 12.1                              |
| Do not think it is necessary               | 6.7               | 2.5              | 4.2                 | 3.9              | 10.8                              |
| Do not think it will be available to me    | 5.0               | 4.6              | 6.5                 | 7.1              | 6.0                               |
| Prefer not to say                          | 4.3               | 6.2              | 4.2                 | 4.2              | 4.2                               |
| Do not think it will work                  | 3.9               | 3.8              | 4.6                 | 2.9              | 7.2                               |
| Pregnancy/breastfeeding                    | 2.4               | 0.7              | 2.8                 | 4.5              | 1.2                               |
| Religious reasons                          | 1.9               | 1.3              | 3.6                 | 2.6              | 2.4                               |
| I took part in a vaccine trial             | 0.3               | 0.3              | 0.4                 | 0.3              | 0.6                               |
| Other                                      | 9.8               | 9.8              | 6.1                 | 9.4              | 13.9                              |

Proportions are calculated within racial and ethnic categories among individuals expressing vaccine unwillingness or unsure if they will obtain one. Participants were allowed to check more than one reason.

| Reason Cited (%)                           | United Kingdom     |                   |                         |                                         |                                    |
|--------------------------------------------|--------------------|-------------------|-------------------------|-----------------------------------------|------------------------------------|
|                                            | White<br>(n=56775) | Black<br>(n=1617) | South Asian<br>(n=1487) | Middle<br>East/East<br>Asian<br>(n=771) | More than<br>one/other<br>(n=1270) |
| Concerned about the long-term side effects | 49.9               | 52.9              | 50.9                    | 55.6                                    | 51.3                               |
| Concerned about adverse reaction           | 30.2               | 39.3              | 36.5                    | 37.2                                    | 34.4                               |
| Do not know enough about it                | 36.7               | 45.0              | 41.9                    | 39.8                                    | 36.0                               |

|                                         |     |     |     |     |      |
|-----------------------------------------|-----|-----|-----|-----|------|
| Personal belief/philosophical reasons   | 5.4 | 7.3 | 6.3 | 4.0 | 5.0  |
| Illness/Medication                      | 5.8 | 5.9 | 5.5 | 5.3 | 4.9  |
| Do not think it is necessary            | 7.5 | 5.6 | 5.9 | 5.1 | 7.6  |
| Do not think it will be available to me | 9.0 | 7.2 | 9.8 | 8.4 | 10.9 |
| Prefer not to say                       | 5.8 | 8.0 | 8.3 | 6.2 | 5.5  |
| Do not think it will work               | 3.0 | 2.8 | 4.7 | 3.4 | 3.7  |
| Pregnancy/breastfeeding                 | 7.6 | 4.8 | 5.9 | 6.0 | 6.3  |
| Religious reasons                       | 0.5 | 1.9 | 1.8 | 1.0 | 1.0  |
| I took part in a vaccine trial          | 0.4 | 0.1 | 0.4 | 0.4 | 0.3  |
| Other                                   | 8.2 | 6.2 | 5.1 | 7.4 | 9.0  |

Proportions are calculated within racial and ethnic categories among individuals expressing vaccine unwillingness or unsure if they will obtain one. Participants were allowed to check more than one reason.



**Supplementary Table 6. Baseline characteristics of study participants by vaccination status and country of enrollment**

|                               | United States           |                            |
|-------------------------------|-------------------------|----------------------------|
|                               | Vaccinated<br>(n=17140) | Unvaccinated<br>(n=56,510) |
| <b>Age (years)</b>            | 69.0 (11.9)             | 57.6 (15.8)                |
| <25                           | 86 (0.5)                | 2403 (4.3)                 |
| 25-34                         | 369 (2.2)               | 3943 (7.0)                 |
| 35-44                         | 577 (3.4)               | 5785 (10.2)                |
| 45-54                         | 809 (4.7)               | 7739 (13.7)                |
| 55-64                         | 1674 (9.8)              | 13293 (23.5)               |
| ≥65                           | 13625 (79.5)            | 23347 (41.3)               |
| <b>Female sex</b>             | 11325 (66.1)            | 36424 (64.5)               |
| <b>Race/ethnicity</b>         |                         |                            |
| White                         | 15341 (89.5)            | 48803 (86.4)               |
| Black                         | 362 (2.1)               | 1817 (3.2)                 |
| Hispanic                      | 519 (3.0)               | 2716 (4.8)                 |
| Asian                         | 716 (4.2)               | 2373 (4.2)                 |
| More than one / other         | 202 (1.2)               | 801 (1.4)                  |
| <b>BMI (kg/m<sup>2</sup>)</b> | 26.6 (5.6)              | 27.2 (6.2)                 |
| <18.5                         | 7258 (42.3)             | 22513 (39.8)               |
| 18.5-24.9                     | 350 (2.0)               | 1179 (2.1)                 |
| 25-29.9                       | 5980 (34.9)             | 18308 (32.4)               |
| ≥30                           | 3552 (20.7)             | 14510 (25.7)               |
| <b>Comorbidities</b>          |                         |                            |
| Diabetes                      | 1157 (6.8)              | 2785 (4.9)                 |
| Heart Disease                 | 2030 (11.8)             | 3676 (6.5)                 |
| Lung Disease                  | 640 (3.7)               | 1478 (2.6)                 |
| Kidney Disease                | 444 (2.6)               | 977 (1.7)                  |
| Cancer                        | 718 (4.2)               | 1369 (2.4)                 |
| <b>Education</b>              | 45.2 (18.2)             | 45.0 (18.7)                |

|                              |               |               |
|------------------------------|---------------|---------------|
| <b>Income</b>                | 81071 (31280) | 80969 (31710) |
| <b>Current/prior smoking</b> | 5745 (33.5)   | 15790 (27.9)  |
| <b>Healthcare worker</b>     | 955 (5.6)     | 1332 (2.4)    |
| <b>Prior COVID-19</b>        | 499 (2.9)     | 4200 (7.4)    |

All racial categories categories were defined as each respective race not of Hispanic or Latino ancestry. Census-level data on education assessed the proportion of the general population above age 25 years with a Bachelor's degree and income using median annual household income. N (percentages) presented for categorical variables. Values are means (SD) for continuous variables. Values of polytomous variables may not sum to 100% due to rounding

Abbreviations: BMI (body mass index), m (meter), kg (kilogram)

|                               | <b>United Kingdom</b>           |                                   |
|-------------------------------|---------------------------------|-----------------------------------|
|                               | <b>Vaccinated</b><br>(n=177242) | <b>Unvaccinated</b><br>(n=977746) |
| <b>Age (years)</b>            | 65.9 (14.6)                     | 52.3 (14.3)                       |
| <25                           | 1634 (0.9)                      | 46476 (4.8)                       |
| 25-34                         | 6095 (3.4)                      | 84558 (8.6)                       |
| 35-44                         | 11012 (6.2)                     | 145746 (14.9)                     |
| 45-54                         | 19009 (10.7)                    | 213802 (21.9)                     |
| 55-64                         | 27574 (15.6)                    | 269405 (27.6)                     |
| ≥65                           | 111918 (63.1)                   | 217759 (22.3)                     |
| <b>Female sex</b>             | 108311 (61.1)                   | 564767 (57.8)                     |
| <b>Race/ethnicity</b>         |                                 |                                   |
| White                         | 171453 (96.7)                   | 939091 (96.0)                     |
| Black                         | 1022 (0.6)                      | 7765 (0.8)                        |
| South Asian                   | 2339 (1.3)                      | 12860 (1.3)                       |
| Middle East/East Asian        | 922 (0.5)                       | 6024 (0.6)                        |
| More than one/other           | 1506 (0.8)                      | 12006 (1.2)                       |
| <b>BMI (kg/m<sup>2</sup>)</b> | 26.6 (5.9)                      | 26.6 (6.1)                        |
| <18.5                         | 77265 (43.6)                    | 421007 (43.1)                     |
| 18.5-24.9                     | 4840 (2.7)                      | 25922 (2.7)                       |
| 25-29.9                       | 61296 (34.6)                    | 325875 (33.3)                     |
| ≥30                           | 33841 (19.1)                    | 204942 (21.0)                     |
| <b>Comorbidities</b>          |                                 |                                   |

|                              |              |               |
|------------------------------|--------------|---------------|
| Diabetes                     | 9125 (5.1)   | 28986 (3.0)   |
| Heart Disease                | 15038 (8.5)  | 28390 (2.9)   |
| Lung Disease                 | 8461 (4.8)   | 14360 (1.5)   |
| Kidney Disease               | 3221 (1.8)   | 6614 (0.7)    |
| Cancer                       | 5969 (4.6)   | 8970 (1.4)    |
| <b>Education</b>             | 7.2 (2.5)    | 7.0 (2.5)     |
| <b>Income</b>                | 7.1 (2.4)    | 6.9 (2.5)     |
| <b>Current/prior smoking</b> | 45240 (25.5) | 212478 (21.7) |
| <b>Healthcare worker</b>     | 15684 (8.8)  | 11241 (1.1)   |
| <b>Prior COVID-19</b>        | 8771 (4.9)   | 59527 (6.1)   |

All racial categories were defined as each respective race not of Hispanic or Latino ancestry. Census-level data on education used the education score and income score for the Index of Multiple Deprivation ,respectively. N (percentages) presented for categorical variables. Values are means (SD) for continuous variables. Values of polytomous variables may not sum to 100% due to rounding  
Abbreviations: BMI (body mass index), m (meter), kg (kilogram)

## Supplementary Table 7. Vaccine uptake by geographical region according to country of enrollment

|                                                          | United States |                     |                     |                     |
|----------------------------------------------------------|---------------|---------------------|---------------------|---------------------|
|                                                          | Northeast     | Midwest             | South               | West                |
| <b>Number of individuals receiving a vaccine / total</b> | 2942/16365    | 2569/13093          | 4541/17633          | 6748/24474          |
| <b>Age-adjusted OR (95% CI)<sup>1</sup></b>              | 1.0 (ref.)    | 1.13 (1.07 to 1.19) | 1.69 (1.61 to 1.77) | 1.52 (1.46 to 1.59) |
| <b>Multivariable-adjusted OR (95% CI)<sup>2</sup></b>    | 1.0 (ref.)    | 1.14 (1.08 to 1.21) | 1.70 (1.62 to 1.79) | 1.52 (1.45 to 1.59) |
| <b>Multivariable-adjusted OR (95% CI)<sup>3</sup></b>    | 1.0 (ref.)    | 1.14 (1.08 to 1.21) | 1.73 (1.65 to 1.82) | 1.55 (1.48 to 1.62) |

<sup>1</sup>Conditioned upon age and date of study entry

<sup>2</sup>Additional conditioning upon sex and adjustment for race/ethnicity, personal history of diabetes, heart disease, lung disease, kidney disease, current smoking status, body mass index, and prior reported history of COVID-19 infection

<sup>3</sup>Additional adjustment for frontline healthcare worker status and education and income at the community level

Regions defined by the U.S. Census Bureau guidelines. The Northeast included the states of Connecticut, Maine, Massachusetts, New Hampshire, New Jersey, New York, Pennsylvania, Rhode Island, and Vermont. The Midwest included the states of Illinois, Indiana, Iowa, Kansas, Michigan, Minnesota, Missouri, Nebraska, North Dakota, Ohio, South Dakota, and Wisconsin. The South included Alabama, Arkansas, Delaware, Florida, Georgia, Kentucky, Louisiana, Maryland, Mississippi, North Carolina, Oklahoma, South Carolina, Tennessee, Texas, Virginia, and West Virginia. The West included Alaska, Arizona, California, Colorado, Hawaii, Idaho, Montana, New Mexico, Nevada, Oregon, Utah, Washington, and Wyoming.

Abbreviations: CI (confidence interval), OR (odds ratio). Data shown through February 1, 2021.

|                                                          | United Kingdom |                     |                     |                     |
|----------------------------------------------------------|----------------|---------------------|---------------------|---------------------|
|                                                          | England        | Northern Ireland    | Scotland            | Wales               |
| <b>Number of individuals receiving a vaccine / total</b> | 151200/952267  | 884/5994            | 4290/56232          | 6770/49811          |
| <b>Age-adjusted OR (95% CI)<sup>1</sup></b>              | 1.0 (ref.)     | 0.92 (0.86 to 0.98) | 0.42 (0.40 to 0.43) | 0.72 (0.70 to 0.74) |
| <b>Multivariable-adjusted OR (95% CI)<sup>2</sup></b>    | 1.0 (ref.)     | 0.91 (0.85 to 0.97) | 0.42 (0.40 to 0.42) | 0.72 (0.70 to 0.73) |
| <b>Multivariable-adjusted OR (95% CI)<sup>3</sup></b>    | 1.0 (ref.)     | 0.89 (0.83 to 0.95) | 0.41 (0.40 to 0.42) | 0.71 (0.70 to 0.73) |

<sup>1</sup>Conditioned upon age and date of study entry

<sup>2</sup>Additional conditioning upon sex and adjustment for race/ethnicity, personal history of diabetes, heart disease, lung disease, kidney disease, current smoking status, body mass index, and prior reported history of COVID-19 infection

<sup>3</sup>Additional adjustment for frontline healthcare worker status and education and income at the community level

Abbreviations: CI (confidence interval), OR (odds ratio). Data shown through February 1, 2021.

**Supplementary Table 8. Localized symptoms among vaccinated participants according to country of enrollment**

|                        | United States      |                  |                      |                   |                                   |
|------------------------|--------------------|------------------|----------------------|-------------------|-----------------------------------|
|                        | White<br>(n=32316) | Black<br>(n=811) | Hispanic<br>(n=1198) | Asian<br>(n=1328) | More than<br>one/other<br>(n=431) |
| Pain                   | 9115 (28.2)        | 228 (28.1)       | 400 (33.4)           | 492 (37.0)        | 134 (31.1)                        |
| Redness                | 708 (2.2)          | 19 (2.3)         | 36 (3.0)             | 30 (2.3)          | 12 (2.8)                          |
| Swelling               | 1427 (4.4)         | 73 (9.0)         | 78 (6.5)             | 98 (7.4)          | 27 (6.3)                          |
| Swollen lymph<br>nodes | 159 (0.5)          | 11 (1.4)         | 13 (1.1)             | 6 (0.5)           | 4 (0.9)                           |
| Warmth                 | 1463 (4.5)         | 46 (5.7)         | 94 (7.8)             | 76 (5.7)          | 38 (8.8)                          |
| Bruising               | 78 (1.1)           | 1 (0.5)          | 10 (4.6)             | 3 (1.4)           | 2 (2.1)                           |
| Itchiness              | 457 (1.4)          | 27 (3.3)         | 22 (1.8)             | 29 (2.2)          | 4 (0.9)                           |
| Tenderness             | 11950 (37.0)       | 281 (34.6)       | 466 (38.9)           | 528 (39.8)        | 157 (36.4)                        |

  

|                        | United Kingdom      |                   |                         |                                       |                                    |
|------------------------|---------------------|-------------------|-------------------------|---------------------------------------|------------------------------------|
|                        | White<br>(n=393456) | Black<br>(n=2218) | South Asian<br>(n=5092) | Middle East/East<br>Asian<br>(n=2051) | More than<br>one/other<br>(n=3378) |
| Pain                   | 53666 (13.6)        | 594 (26.8)        | 1662 (32.6)             | 514 (25.1)                            | 800 (23.7)                         |
| Redness                | 6387 (1.6)          | 56 (2.5)          | 131 (2.6)               | 45 (2.2)                              | 82 (2.4)                           |
| Swelling               | 10144 (2.6)         | 158 (7.1)         | 302 (5.9)               | 81 (3.9)                              | 160 (4.7)                          |
| Swollen lymph<br>nodes | 1558 (0.4)          | 23 (1.0)          | 46 (0.9)                | 11 (0.5)                              | 22 (0.7)                           |
| Warmth                 | 15787 (4.0)         | 164 (7.4)         | 300 (5.9)               | 119 (5.8)                             | 171 (5.1)                          |
| Bruising               | 2095 (1.7)          | 12 (2.0)          | 18 (1.5)                | 12 (2.2)                              | 25 (2.6)                           |
| Itchiness              | 4029 (1.0)          | 38 (1.7)          | 78 (1.5)                | 29 (1.4)                              | 58 (1.7)                           |
| Tenderness             | 111833 (28.4)       | 760 (34.3)        | 1559 (30.6)             | 592 (28.9)                            | 1101 (32.6)                        |

Proportions are calculated within racial and ethnic categories among individuals expressing vaccine unwillingness or unsure if they will obtain one. Participants were allowed to check more than one reason.

## Supplementary Table 9. Vaccine-related questions through February 1, 2021

---

### Vaccine Willingness

---

Would you accept a COVID-19 vaccine if offered?

1. Yes
2. No
3. Unsure

If No or Unsure, tell us why. (Tick all that apply)

1. I took part in a vaccine trial
  2. Religious reasons
  3. Personal belief/philosophical reasons
  4. Pregnancy/breastfeeding
  5. Concerned about the long-term side effects
  6. Do not know enough about it
  7. Illness/Medication
  8. Do not think it will be available to me
  9. Do not think it is necessary
  10. Do not think it will work
  11. Concerned about adverse reaction
  12. Prefer not to say
  13. Other (free text)
- 

### Vaccine Uptake

---

Vaccine brand

Dose number

Date received

Batch (U.S.)/Lot (U.K.) number

---

### Vaccine-related Symptoms

---

---

**Are you experiencing any symptoms near the injection site? (Check all that apply)**

1. Pain
  2. Redness
  3. Swelling
  4. Swollen glands in the armpit
  5. Warmth
  6. Itch
  7. Tenderness
  8. Bruising
  9. Other (free text)
-

**Supplementary Table 10. Race and ethnicity categories by country of enrollment**

| <b>United States</b>                                                                                     |                        |
|----------------------------------------------------------------------------------------------------------|------------------------|
| <b>Responses</b>                                                                                         | <b>Categories</b>      |
| Non-Hispanic white                                                                                       | White, non-Hispanic    |
| Black or African-American                                                                                | Black                  |
| Hispanic/LatinX                                                                                          | Hispanic               |
| Asian                                                                                                    | Asian                  |
| Native Hawaiian or other Pacific Islander                                                                | Asian                  |
| American Indian or Alaska Native                                                                         | More than one/other    |
| Other non-Hispanic racial group, other racial or ethnic group, multiple race/ethnicity groups identified | More than one/other    |
| <b>United Kingdom</b>                                                                                    |                        |
| <b>Responses</b>                                                                                         | <b>Categories</b>      |
| White- British, Irish, or other                                                                          | White                  |
| Black/Black British - Caribbean, African, or other                                                       | Black                  |
| Asian/Asian British - Indian, Pakistani, Bangladeshi, or other                                           | South Asian            |
| Chinese/Chinese British                                                                                  | Middle East/East Asian |
| Middle Eastern/Middle Eastern British - Arab, Turkish, other                                             | Middle East/East Asian |
| East/Southeast Asian, other, or mixed/multiple race - white and Black/Black British, other               | More than one/other    |



## Supplementary Table 11. Partnering cohorts within the COPE Consortium

| <b>Cohort Name</b>                   | <b>Cohort contact (non-contributing authors)</b>                                        |
|--------------------------------------|-----------------------------------------------------------------------------------------|
| ACS Cancer Prevention Study 3        | Alpa V. Patel, Anusila Deka                                                             |
| The Agricultural Health Study        | Laura Beane-Freeman/ Dale P Sandler                                                     |
| ASPREE-XT                            | Michael E. Ernst, Brenda Kirpach, Anne M. Murray                                        |
| Black Women's Health Study           | Julie R. Palmer, Lynn Rosenberg                                                         |
| Growing Up to Today Study            | Jaime E. Hart, Jorge E. Chavarro                                                        |
| The GuLF Study                       | Dale P. Sandler                                                                         |
| Health Professionals Follow-up Study | Lorelei A. Mucci, Walter C. Willett                                                     |
| Multiethnic Cohort Study             | Loic Le Marchand, Lynne R. Wilkens                                                      |
| Nurses' Health Study I, II and 3     | Meir Stampfer, Walter C. Willett, Heather A. Eliassen, Jaime E. Hart, Jorge E. Chavarro |
| PREDICT 2                            | NA                                                                                      |
| The Sister Study                     | Dale P. Sandler                                                                         |
| Stanford Nutrition Studies           | Christopher D. Gardner                                                                  |
| UCSD/COH California Teachers Study   | Maria Elena Martinez, James V. Lacey                                                    |
| Twins U.K.                           | NA                                                                                      |

## **Supplementary References**

1. Download Data [Internet]. [cited 2021 Feb 14];Available from: <https://www.ers.usda.gov/data-products/county-level-data-sets/download-data/>
2. Website [Internet]. [cited 2021 Feb 14];Available from: <https://www.gov.uk/government/statistics/english-indices-of-deprivation-2019>
3. Census geography [Internet]. [cited 2021 Feb 18];Available from: <https://www.ons.gov.uk/methodology/geography/ukgeographies/censusgeography>
4. Census geography [Internet]. [cited 2021 Feb 18];Available from: <https://www.ons.gov.uk/methodology/geography/ukgeographies/censusgeography>
